# Supplementary material for: Differentially Expressed MicroRNAs in Postpartum Breast Cancer in Hispanic Women
Source: PubMed Central journal article supplement (PMC4395255; doi:10.1371/journal.pone.0124340), 2015-04-13
Supplement: pone.0124340.s001.pdf [file pone.0124340.s001.pdf]

**S1 Table. DNA Methylation Primers**

| Chromosome | Start       | End         | Amplicon Name  | 10F Primer Sequence                     | T7R Primer Sequence                                    |
|------------|-------------|-------------|----------------|-----------------------------------------|--------------------------------------------------------|
| chr9       | 21,560,136  | 21,560,334  | mir-31         | aggaagagagGAGAGGGAGTTTATTTGTAAGAGTTAGAG | cagtaatacgactcactataggagaaggctAAACCACTCCAATAAAAAACACC  |
| chrX       | 133,307,701 | 133,307,836 | mir-106a       | aggaagagagGGTTGTAAAGTTTGTGTATGAAAA      | cagtaatacgactcactataggagaaggctAAAAATCCAACCTAAACTACCAAC |
| chr1       | 205,425,371 | 205,425,523 | mir-135b_upTSS | aggaagagagTTGAATTTTTGGGAATTGGTATTT      | cagtaatacgactcactataggagaaggctACTACAAAAACCCCTAAAAACCC  |
| chr1       | 205,418,961 | 205,419,140 | mir-135b_TSS   | aggaagagagGGAGGGAGGAGGTTTGTTTT          | cagtaatacgactcactataggagaaggctTAAACGAAAACTAAAAATCCCAAA |
| chr16      | 56,881,571  | 56,881,768  | mir-138-2      | aggaagagagTTGTTTTTAAGAGGTTTAATTAGATTG   | cagtaatacgactcactataggagaaggctCTTTAACTCCCCAACTCAAAAAA  |
| chrX       | 133,678,663 | 133,678,845 | mir-542        | aggaagagagGGTTTTTTTTGGAGTTAGAAGGAAG     | cagtaatacgactcactataggagaaggctCCCCAAATCAAAATCCCTTAC    |

List of genomic locations of MassARRAY amplicons (hg19 coordinates) and primer sequences for each amplicon obtained from the Sequenom EpiDesigner software.
