# Supplementary material for: Differentially Expressed MicroRNAs in Postpartum Breast Cancer in Hispanic Women
Source: PubMed Central journal article supplement (PMC4395255; doi:10.1371/journal.pone.0124340), 2015-04-13
Supplement: pone.0124340.s002.pdf [file pone.0124340.s002.pdf]

**S2 Table. *Ella* case series characteristics.**

| Characteristic, <i>n</i> (%)     | Time since last full-term pregnancy |                                    | Total<br><i>n</i> = 56 | <i>P</i><br>( <i>t</i> -test or<br>Fisher's<br>exact test) |
|----------------------------------|-------------------------------------|------------------------------------|------------------------|------------------------------------------------------------|
|                                  | ≤ 5.2 y<br>(Early)<br><i>n</i> = 12 | ≥ 5.3 y<br>(Late)<br><i>n</i> = 44 |                        |                                                            |
| Age at diagnosis, mean ± SD      | 36.4 ± 5.4                          | 43.6 ± 5.4                         | 42.0 ± 6.1             | < 0.001                                                    |
| < 50 y                           | 12 (100.)                           | 41 (93.2)                          | 53 (94.6)              |                                                            |
| ≥ 50 y                           | 0 (0.00)                            | 3 (6.82)                           | 3 (5.36)               |                                                            |
| ER status                        |                                     |                                    |                        | 0.325                                                      |
| Negative                         | 7 (58.3)                            | 17 (38.6)                          | 24 (42.9)              |                                                            |
| Positive                         | 5 (41.7)                            | 27 (61.4)                          | 32 (57.1)              |                                                            |
| PR status                        |                                     |                                    |                        | 0.108                                                      |
| Negative                         | 7 (58.3)                            | 14 (31.8)                          | 21 (37.5)              |                                                            |
| Positive                         | 5 (41.7)                            | 30 (68.2)                          | 35 (62.5)              |                                                            |
| HER2 status                      |                                     |                                    |                        | 1.000                                                      |
| Negative                         | 10 (83.3)                           | 34 (77.3)                          | 44 (78.6)              |                                                            |
| Positive                         | 2 (16.7)                            | 10 (22.7)                          | 12 (21.4)              |                                                            |
| Tumor subtype                    |                                     |                                    |                        | 0.236                                                      |
| HR+                              | 5 (41.7)                            | 27 (61.4)                          | 32 (57.1)              |                                                            |
| HER2+                            | 2 (16.7)                            | 9 (24.3)                           | 11 (19.6)              |                                                            |
| TNBC                             | 5 (41.7)                            | 8 (18.2)                           | 13 (23.2)              |                                                            |
| Parity                           |                                     |                                    |                        | 0.523                                                      |
| 1–2 children                     | 5 (41.7)                            | 24 (54.6)                          | 29 (51.8)              |                                                            |
| 3+ children                      | 7 (58.3)                            | 20 (45.5)                          | 27 (48.2)              |                                                            |
| Age at first full-term pregnancy |                                     |                                    |                        | 0.840                                                      |
| < 21 y                           | 6 (50.0)                            | 17 (38.6)                          | 23 (41.1)              |                                                            |
| 21–24 y                          | 2 (16.7)                            | 10 (22.7)                          | 14 (21.5)              |                                                            |
| ≥ 25 y                           | 4 (33.3)                            | 17 (38.6)                          | 21 (37.5)              |                                                            |

Participant characteristics based on the separation of the samples by time since last full-term pregnancy. The sample case series totals (*n* = 56), and is restricted to non-neoadjuvant therapy patients. It does include 4 participants who had a tumor sample (biopsy) taken before neoadjuvant therapy was performed.
